# Supplementary material for: Layer-by-layer coating of alginate matrices with chitosan–alginate for the improved survival and targeted delivery of probiotic bacteria after oral administration
Source: Royal Society of Chemistry journal article supplement (doi:10.1039/c2tb00126h), 2012-11-05
Supplement: c2tb00126h.pdf [file c2tb00126h.pdf]

## Supplementary information

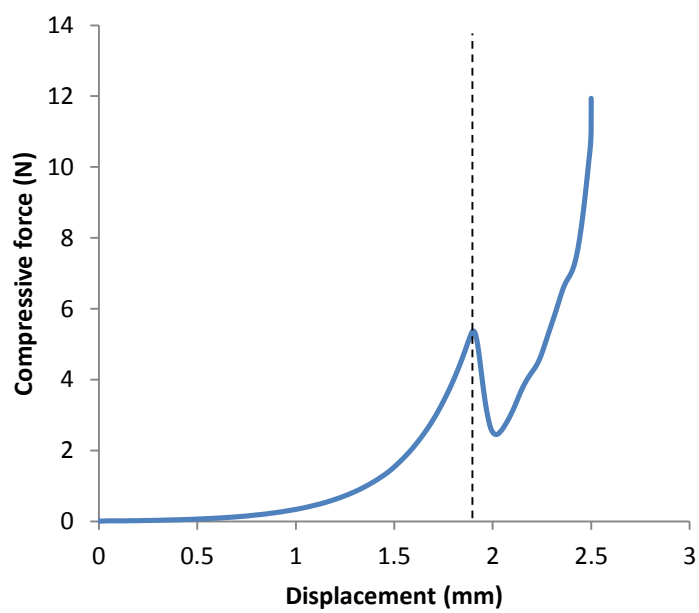

Example compression test, showing the point at which alginate matrices fracture
